# Supplementary material for: In situ growth of lamellar ZnTiO3 nanosheets on TiO2 tubular array with enhanced photocatalytic activity
Source: Royal Society of Chemistry journal article supplement (doi:10.1039/c3cp53307g), 2013-01-01
Supplement: c3cp53307g.pdf [file c3cp53307g.pdf]

## Supplementary Information

### **In-situ growth of lamellar ZnTiO<sub>3</sub> nanosheets on TiO<sub>2</sub> tubular array with enhanced photocatalytic activity**

Yunyu Cai,<sup>a</sup> Yixing Ye,<sup>a</sup> Zhenfei Tian,<sup>a</sup> Jun Liu,<sup>a</sup> Yishu Liu<sup>b</sup> and Changhao Liang<sup>a,\*</sup>

<sup>a</sup>Key Laboratory of Materials Physics and Anhui Key Laboratory of Nanomaterials and Nanotechnology, Institute of Solid State Physics, Hefei Institutes of Physical Science, Chinese Academy of Sciences, Hefei 230031, China

<sup>b</sup>Anhui Provincial Laboratory of Biomimetic Sensor and Detecting Technology, West Anhui University, Lu'an, Anhui 237015, PR China.

\*Corresponding author. Tel.: +86 551 65591129; Fax: +86 551 65591434.

E-mail address: chliang@issp.ac.cn (C. H. Liang).

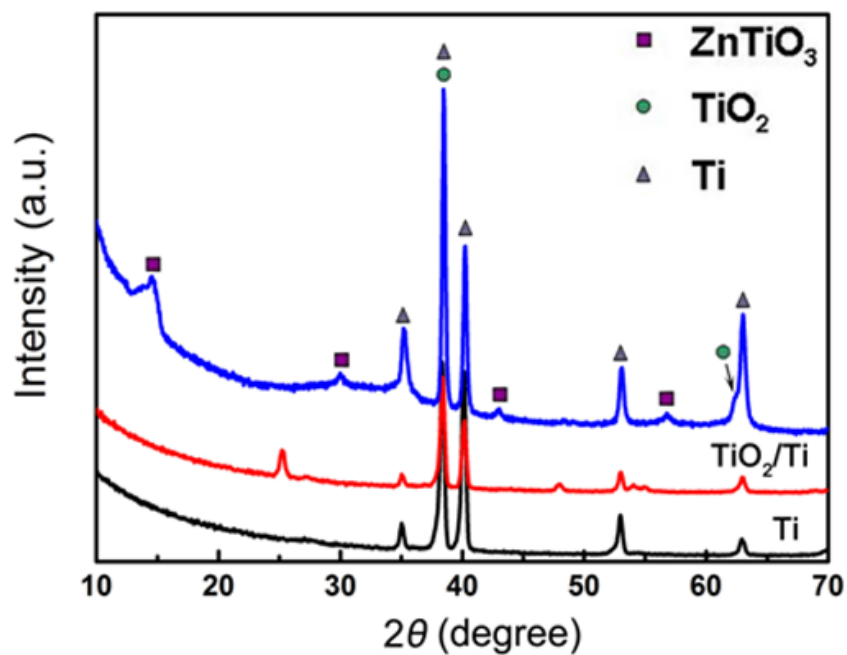

**Figure S1.** XRD spectra of the heterojunction of ZnTiO<sub>3</sub> NPs, TNTs and metal Ti foil.

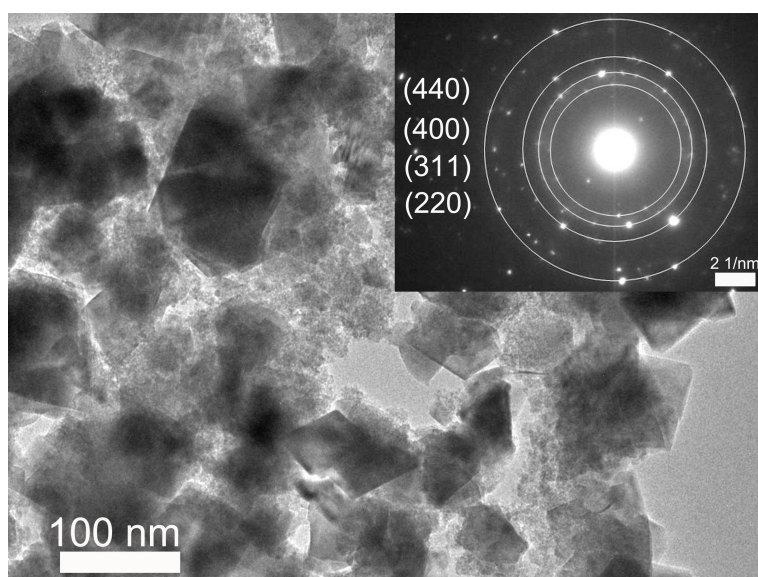

**Figure S2.** TEM image of ZnTiO<sub>3</sub> NPs with inserted SAED pattern.

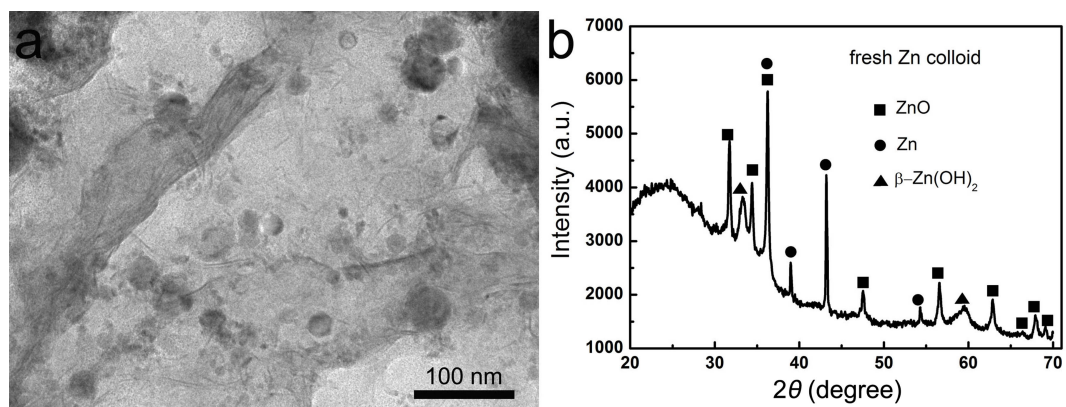

**Figure S3.** (a) TEM image of fresh  $\text{ZnO}_x\text{H}_y$  colloidal particles, (b) XRD product analysis of fresh  $\text{ZnO}_x\text{H}_y$  colloidal particles.
